# Supplementary material for: Epidemiological Trends of Dengue Disease in Thailand (2000–2011): A Systematic Literature Review
Source: PubMed Central journal article supplement (PMC4222696; doi:10.1371/journal.pntd.0003241), 2014-11-06
Supplement: pntd.0003241.s002.pdf [file pntd.0003241.s002.pdf]

**Table S1.** Databases searched for citations relating to dengue disease epidemiology in Thailand

| <b>Database</b>                                                                                   | <b>Website</b>                                                                                                                                  |
|---------------------------------------------------------------------------------------------------|-------------------------------------------------------------------------------------------------------------------------------------------------|
| Excerpta Medica Database (EMBASE)                                                                 | <a href="http://embase.com">http://embase.com</a>                                                                                               |
| MedLine                                                                                           | <a href="http://www.ncbi.nlm.nih.gov/pubmed">http://www.ncbi.nlm.nih.gov/pubmed</a>                                                             |
| United States National Library of Medicine and the National Institutes of Health Medical Database | <a href="http://www.ncbi.nlm.nih.gov/pubmed/">http://www.ncbi.nlm.nih.gov/pubmed/</a>                                                           |
| WHO Library database (WHOLIS)                                                                     | <a href="http://www.who.int/publications/en/">http://www.who.int/publications/en/</a>                                                           |
| WHO Regional Office for Southeast Asia (WHO SEAR)                                                 | <a href="http://www.searo.who.int/index.htm">http://www.searo.who.int/index.htm</a>                                                             |
| Index Medicus for Southeast Asia Region (IMSEAR)                                                  | <a href="http://imsear.hellis.org/">http://imsear.hellis.org/</a>                                                                               |
| Thailand Ministry of Health official bulletins                                                    | <a href="http://www.boe.moph.go.th">http://www.boe.moph.go.th</a>                                                                               |
| Medical Association of Thailand                                                                   | <a href="http://www.mat.or.th/journal/index.php?command=vol&amp;selvol=94">http://www.mat.or.th/journal/index.php?command=vol&amp;selvol=94</a> |
| Western Pacific Surveillance and Response (WPSAR)                                                 | <a href="http://www.wpro.who.int/wpsar/home.htm">http://www.wpro.who.int/wpsar/home.htm</a>                                                     |
| Armed Forces Research Institute of Medical Sciences                                               | <a href="http://www.afirms.org/weblib/pub/index.shtml">http://www.afirms.org/weblib/pub/index.shtml</a>                                         |
| WHO Western Pacific Region (WPRO)                                                                 | <a href="http://www.wpro.who.int/en/">http://www.wpro.who.int/en/</a>                                                                           |
| Google                                                                                            |                                                                                                                                                 |
