# Supplementary material for: Epidemiological Trends of Dengue Disease in Thailand (2000–2011): A Systematic Literature Review
Source: PubMed Central journal article supplement (PMC4222696; doi:10.1371/journal.pntd.0003241), 2014-11-06
Supplement: pntd.0003241.s004.pdf [file pntd.0003241.s004.pdf]

**Table S3. Incidence of dengue disease in Thailand: regional data.**

| Year      | Region                   | DF                 |                                    | Laboratory-confirmed DF (n) | DHF (n) | DF-related mortality (n) | Source of data                      |
|-----------|--------------------------|--------------------|------------------------------------|-----------------------------|---------|--------------------------|-------------------------------------|
|           |                          | Notified cases (n) | Incidence (per 100,000 population) |                             |         |                          |                                     |
| 1996–2005 | Amnat Charoen            |                    | 3.19*                              |                             |         |                          | Silawan et al., 2008 <sup>A</sup>   |
| 1996–2005 | Buri Ram                 |                    | 4.58*                              |                             |         |                          | Silawan et al., 2008 <sup>A</sup>   |
| 1996–2005 | Chaiyaphum               |                    | 3.63*                              |                             |         |                          | Silawan et al., 2008 <sup>A</sup>   |
| 1996–2005 | Kalasin                  |                    | 3.75*                              |                             |         |                          | Silawan et al., 2008 <sup>A</sup>   |
| 1996–2005 | Khon Kaen                |                    | 3.19*                              |                             |         |                          | Silawan et al., 2008 <sup>A</sup>   |
| 1996–2005 | Loei                     |                    | 3.35*                              |                             |         |                          | Silawan et al., 2008 <sup>A</sup>   |
| 1996–2005 | Maha Sarakham            |                    | 1.94*                              |                             |         |                          | Silawan et al., 2008 <sup>A</sup>   |
| 1996–2005 | Mukdahan                 |                    | 3.92*                              |                             |         |                          | Silawan et al., 2008 <sup>A</sup>   |
| 1996–2005 | Nakhon Phanom            |                    | 1.77*                              |                             |         |                          | Silawan et al., 2008 <sup>A</sup>   |
| 1996–2005 | Nakhon Ratchasima        |                    | 4.63*                              |                             |         |                          | Silawan et al., 2008 <sup>A</sup>   |
| 1996–2005 | Nong Bua Lam Phu         |                    | 2.13*                              |                             |         |                          | Silawan et al., 2008 <sup>A</sup>   |
| 1996–2005 | Nong Khai                |                    | 2.76*                              |                             |         |                          | Silawan et al., 2008 <sup>A</sup>   |
| 1996–2005 | Roi Et                   |                    | 4.17*                              |                             |         |                          | Silawan et al., 2008 <sup>A</sup>   |
| 1996–2005 | Sakon Nakhon             |                    | 4.01*                              |                             |         |                          | Silawan et al., 2008 <sup>A</sup>   |
| 1996–2005 | Si Sa Ket                |                    | 4.00*                              |                             |         |                          | Silawan et al., 2008 <sup>A</sup>   |
| 1996–2005 | Surin                    |                    | 3.61*                              |                             |         |                          | Silawan et al., 2008 <sup>A</sup>   |
| 1996–2005 | Ubon Ratchathani         |                    | 3.93*                              |                             |         |                          | Silawan et al., 2008 <sup>A</sup>   |
| 1996–2005 | Udon Thani               |                    | 2.07*                              |                             |         |                          | Silawan et al., 2008 <sup>A</sup>   |
| 1996–2005 | Yasothon                 |                    | 2.30*                              |                             |         |                          | Silawan et al., 2008 <sup>A</sup>   |
| 1996–2005 | Northeast region (total) |                    | 3.53*                              |                             |         |                          | Silawan et al., 2008 <sup>A</sup>   |
| 1996–2005 | Northern region          | 44,176             |                                    |                             |         |                          | Tipayamongkholgul et al., 2009 [47] |
| 1996–2005 | Southern region          | 54,051             |                                    |                             |         |                          | Tipayamongkholgul et al., 2009 [47] |

| Year      | Region             | DF                 |                                    | Laboratory-confirmed DF (n) | DHF (n) | DF-related mortality (n) | Source of data                      |
|-----------|--------------------|--------------------|------------------------------------|-----------------------------|---------|--------------------------|-------------------------------------|
|           |                    | Notified cases (n) | Incidence (per 100,000 population) |                             |         |                          |                                     |
| 1996–2005 | Chiangmai          |                    | ~6* <sup>†</sup>                   |                             |         |                          | Tipayamongkholgul et al., 2009 [47] |
| 1996–2005 | Chiangrai          |                    | ~6* <sup>†</sup>                   |                             |         |                          | Tipayamongkholgul et al., 2009 [47] |
| 1996–2005 | Chumphon           |                    | ~10* <sup>†</sup>                  |                             |         |                          | Tipayamongkholgul et al., 2009 [47] |
| 1996–2005 | Lampang            |                    | ~8* <sup>†</sup>                   |                             |         |                          | Tipayamongkholgul et al., 2009 [47] |
| 1996–2005 | Lampun             |                    | ~6* <sup>†</sup>                   |                             |         |                          | Tipayamongkholgul et al., 2009 [47] |
| 1996–2005 | Maehongson         |                    | ~4* <sup>†</sup>                   |                             |         |                          | Tipayamongkholgul et al., 2009 [47] |
| 1996–2005 | Nakhon Sithammarat |                    | ~10* <sup>†</sup>                  |                             |         |                          | Tipayamongkholgul et al., 2009 [47] |
| 1996–2005 | Nan                |                    | ~4* <sup>†</sup>                   |                             |         |                          | Tipayamongkholgul et al., 2009 [47] |
| 1996–2005 | Petchaburi         |                    | ~9* <sup>†</sup>                   |                             |         |                          | Tipayamongkholgul et al., 2009 [47] |
| 1996–2005 | Phayao             |                    | ~8* <sup>†</sup>                   |                             |         |                          | Tipayamongkholgul et al., 2009 [47] |
| 1996–2005 | Phrae              |                    | ~7* <sup>†</sup>                   |                             |         |                          | Tipayamongkholgul et al., 2009 [47] |
| 1996–2005 | Prachuap Khirikhan |                    | ~11* <sup>†</sup>                  |                             |         |                          | Tipayamongkholgul et al., 2009 [47] |
| 1996–2005 | Surat Thani        |                    | ~18* <sup>†</sup>                  |                             |         |                          | Tipayamongkholgul et al., 2009 [47] |

| Year      | Region                           | DF                 |                                    | Laboratory-confirmed DF (n) | DHF (n)          | DF-related mortality (n) | Source of data                     |
|-----------|----------------------------------|--------------------|------------------------------------|-----------------------------|------------------|--------------------------|------------------------------------|
|           |                                  | Notified cases (n) | Incidence (per 100,000 population) |                             |                  |                          |                                    |
| 1999–2002 | Thai–Myanmar border <sup>‡</sup> |                    |                                    | 9                           |                  |                          | Ellis et al., 2006 <sup>B</sup>    |
| 2000      | Bangkok <sup>§</sup>             |                    |                                    |                             | 71               |                          | Sriprom et al., 2003 [38]          |
| 2000      | Bangkok <sup>§</sup>             |                    |                                    | 24                          | 7 <sup>¶</sup>   |                          | Fried et al., 2010 [52]            |
| 2000      | Kamphaeng Phet                   |                    |                                    |                             |                  | 0                        | Endy et al., 2011 [56]             |
| 2000      | Kamphaeng Phet <sup>**</sup>     |                    |                                    | 15                          |                  |                          | Anderson et al., 2007 <sup>C</sup> |
| 2000      | Central region                   |                    |                                    |                             | 13,013           | 18                       | MoPH, 2002 [25]                    |
| 2000      | Northern region                  |                    |                                    |                             | 1751             | 4                        | MoPH, 2002 [25]                    |
| 2000      | Northeastern region              |                    |                                    |                             | 1648             | 1                        | MoPH, 2002 [25]                    |
| 2000      | Southern region                  |                    |                                    |                             | 2205             | 9                        | MoPH, 2002 [25]                    |
| 2000–2004 | Southern Thailand <sup>††</sup>  |                    |                                    |                             | 113,591          | 251                      | Promprou et al., 2006 <sup>D</sup> |
| 2001      | Bangkok <sup>‡‡</sup>            |                    |                                    |                             | 334              |                          | Sriprom et al., 2003 [38]          |
| 2001      | Bangkok <sup>‡‡</sup>            |                    |                                    | 27                          | 18 <sup>**</sup> |                          | Fried et al., 2010 [52]            |
| 2001      | Kamphaeng Phet                   |                    |                                    |                             |                  | 0                        | Endy et al., 2011 [56]             |
| 2001      | Kamphaeng Phet <sup>**</sup>     |                    |                                    | 132                         |                  | 0                        | Anderson et al., 2007 <sup>C</sup> |
| 2001      | Central region                   |                    |                                    |                             | 57,567           | 106                      | MoPH, 2002 [25]                    |
| 2001      | Northern region                  |                    |                                    |                             | 27,562           | 33                       | MoPH, 2002 [25]                    |
| 2001      | Northeastern region              |                    |                                    |                             | 27,668           | 42                       | MoPH, 2002 [25]                    |
| 2001      | Southern region                  |                    |                                    |                             | 26,558           | 64                       | MoPH, 2002 [25]                    |
| 2002      | Bangkok <sup>§</sup>             |                    |                                    |                             | 186              |                          | Sriprom et al., 2003 [38]          |
| 2002      | Bangkok <sup>§</sup>             |                    |                                    | 16                          | 9 <sup>**</sup>  |                          | Fried et al., 2010 [52]            |
| 2002      | Kamphaeng Phet                   |                    |                                    |                             |                  |                          | Endy et al., 2011 [56]             |
| 2002      | Kamphaeng Phet <sup>**</sup>     |                    |                                    | 33                          |                  |                          | Anderson et al., 2007 <sup>C</sup> |
| 2002      | Central region                   |                    |                                    |                             | 30,027           | 32                       | MoPH 2002 [25]                     |
| 2002      | Northern region                  |                    |                                    |                             | 13,915           | 23                       | MoPH 2002 [25]                     |
| 2002      | Northeastern region              |                    |                                    |                             | 37,191           | 57                       | MoPH 2002 [25]                     |

| Year | Region                           | DF                 |                                    | Laboratory-confirmed DF (n) | DHF (n) | DF-related mortality (n) | Source of data                     |
|------|----------------------------------|--------------------|------------------------------------|-----------------------------|---------|--------------------------|------------------------------------|
|      |                                  | Notified cases (n) | Incidence (per 100,000 population) |                             |         |                          |                                    |
| 2002 | Southern region                  |                    |                                    |                             | 33,667  | 64                       | MoPH 2002 [25]                     |
| 2002 | Southern Thailand <sup>††</sup>  |                    |                                    |                             | 33,617  | 64; 0.77                 | Promprou et al., 2006 <sup>D</sup> |
| 2003 | Bangkok <sup>§‡‡</sup>           |                    |                                    |                             | 121     | 0                        | Sriprom et al., 2003 [38]          |
| 2003 | Central region                   |                    |                                    | 25,406                      |         |                          | MoPH, 2003 [26]                    |
| 2003 | Northern region                  |                    |                                    | 11,092                      |         |                          | MoPH, 2003 [26]                    |
| 2003 | Northeastern region              |                    |                                    | 18,954                      |         |                          | MoPH, 2003 [26]                    |
| 2003 | Southern region                  |                    |                                    | 8205                        |         |                          | MoPH, 2003 [26]                    |
| 2004 | Bangkok <sup>§</sup>             |                    |                                    | 36                          | 14**    |                          | Fried et al., 2010 [52]            |
| 2005 | Southern Thailand <sup>†‡‡</sup> |                    |                                    |                             | 2991    | 5                        | Promprou et al., 2006 <sup>D</sup> |
| 2005 | Akat Amnuai                      | 5                  |                                    |                             |         |                          | Sriprom et al., 2010 <sup>E</sup>  |
| 2005 | Ban Muang                        | 18                 |                                    |                             |         |                          | Sriprom et al., 2010 <sup>E</sup>  |
| 2005 | Charoen Sin                      | 10                 |                                    |                             |         |                          | Sriprom et al., 2010 <sup>E</sup>  |
| 2005 | Kham Ta Kla                      | 7                  |                                    |                             |         |                          | Sriprom et al., 2010 <sup>E</sup>  |
| 2005 | Khok Si Suphan                   | 20                 |                                    |                             |         |                          | Sriprom et al., 2010 <sup>E</sup>  |
| 2005 | Ku Su Man                        | 8                  |                                    |                             |         |                          | Sriprom et al., 2010 <sup>E</sup>  |
| 2005 | Kut Bak                          | 6                  |                                    |                             |         |                          | Sriprom et al., 2010 <sup>E</sup>  |
| 2005 | Mueang Sakon Nakhon              | 75                 |                                    |                             |         |                          | Sriprom et al., 2010 <sup>E</sup>  |
| 2005 | Nikhom Nam Un                    | 4                  |                                    |                             |         |                          | Sriprom et al., 2010 <sup>E</sup>  |
| 2005 | Phang Khon                       | 12                 |                                    |                             |         |                          | Sriprom et al., 2010 <sup>E</sup>  |
| 2005 | Phanna Nikhom                    | 11                 |                                    |                             |         |                          | Sriprom et al., 2010 <sup>E</sup>  |
| 2005 | Phon Na Kaeo                     | 4                  |                                    |                             |         |                          | Sriprom et al., 2010 <sup>E</sup>  |
| 2005 | Phu Phan                         | 14                 |                                    |                             |         |                          | Sriprom et al., 2010 <sup>E</sup>  |
| 2005 | Sawang Daen Din                  | 54                 |                                    |                             |         |                          | Sriprom et al., 2010 <sup>E</sup>  |
| 2005 | Song Dao                         | 9                  |                                    |                             |         |                          | Sriprom et al., 2010 <sup>E</sup>  |
| 2005 | Tao Ngoi                         | 17                 |                                    |                             |         |                          | Sriprom et al., 2010 <sup>E</sup>  |
| 2005 | Wanon Niwat                      | 77                 |                                    |                             |         |                          | Sriprom et al., 2010 <sup>E</sup>  |

| Year | Region                | DF                 |                                    | Laboratory-confirmed DF (n) | DHF (n)         | DF-related mortality (n) | Source of data                    |
|------|-----------------------|--------------------|------------------------------------|-----------------------------|-----------------|--------------------------|-----------------------------------|
|      |                       | Notified cases (n) | Incidence (per 100,000 population) |                             |                 |                          |                                   |
| 2005 | Waritchaphum          | 11                 |                                    |                             |                 |                          | Sriprom et al., 2010 <sup>E</sup> |
| 2005 | Sakon Nakhon province | 362                |                                    |                             |                 |                          | Sriprom et al., 2010 <sup>E</sup> |
| 2005 | Bangkok <sup>§</sup>  |                    |                                    | 25                          | 7 <sup>¶</sup>  |                          | Endy et al., 2011 [56]            |
| 2006 | Akat Amnuai           | 15                 |                                    |                             |                 |                          | Sriprom et al., 2010 <sup>E</sup> |
| 2006 | Ban Muang             | 44                 |                                    |                             |                 |                          | Sriprom et al., 2010 <sup>E</sup> |
| 2006 | Charoen Sin           | 13                 |                                    |                             |                 |                          | Sriprom et al., 2010 <sup>E</sup> |
| 2006 | Kham Ta Kla           | 40                 |                                    |                             |                 |                          | Sriprom et al., 2010 <sup>E</sup> |
| 2006 | Khok Si Suphan        | 7                  |                                    |                             |                 |                          | Sriprom et al., 2010 <sup>E</sup> |
| 2006 | Ku Su Man             | 15                 |                                    |                             |                 |                          | Sriprom et al., 2010 <sup>E</sup> |
| 2006 | Kut Bak               | 48                 |                                    |                             |                 |                          | Sriprom et al., 2010 <sup>E</sup> |
| 2006 | Mueang Sakon Nakhon   | 114                |                                    |                             |                 |                          | Sriprom et al., 2010 <sup>E</sup> |
| 2006 | Nikhom Nam Un         | 8                  |                                    |                             |                 |                          | Sriprom et al., 2010 <sup>E</sup> |
| 2006 | Phang Khon            | 12                 |                                    |                             |                 |                          | Sriprom et al., 2010 <sup>E</sup> |
| 2006 | Phanna Nikhom         | 11                 |                                    |                             |                 |                          | Sriprom et al., 2010 <sup>E</sup> |
| 2006 | Phon Na Kaeo          | 16                 |                                    |                             |                 |                          | Sriprom et al., 2010 <sup>E</sup> |
| 2006 | Phu Phan              | 12                 |                                    |                             |                 |                          | Sriprom et al., 2010 <sup>E</sup> |
| 2006 | Sawang Daen Din       | 142                |                                    |                             |                 |                          | Sriprom et al., 2010 <sup>E</sup> |
| 2006 | Song Dao              | 105                |                                    |                             |                 |                          | Sriprom et al., 2010 <sup>E</sup> |
| 2006 | Tao Ngoi              | 6                  |                                    |                             |                 |                          | Sriprom et al., 2010 <sup>E</sup> |
| 2006 | Wanon Niwat           | 20                 | 4                                  |                             |                 |                          | Sriprom et al., 2010 <sup>E</sup> |
| 2006 | Waritchaphum          | 10                 |                                    |                             |                 |                          | Sriprom et al., 2010 <sup>E</sup> |
| 2006 | Sakon Nakhon province | 822                |                                    |                             |                 |                          | Sriprom et al., 2010 <sup>E</sup> |
| 2006 | Bangkok <sup>§</sup>  |                    |                                    | 24                          | 20 <sup>¶</sup> |                          | Endy et al., 2011 [56]            |
| 2007 | Akat Amnuai           | 64                 |                                    |                             |                 |                          | Sriprom et al., 2010 <sup>E</sup> |
| 2007 | Ban Muang             | 25                 |                                    |                             |                 |                          | Sriprom et al., 2010 <sup>E</sup> |
| 2007 | Charoen Sin           | 1                  |                                    |                             |                 |                          | Sriprom et al., 2010 <sup>E</sup> |

| Year | Region                    | DF                 |                                    | Laboratory-confirmed DF (n) | DHF (n) | DF-related mortality (n) | Source of data                    |
|------|---------------------------|--------------------|------------------------------------|-----------------------------|---------|--------------------------|-----------------------------------|
|      |                           | Notified cases (n) | Incidence (per 100,000 population) |                             |         |                          |                                   |
| 2007 | Kham Ta Kla               | 90                 |                                    |                             |         |                          | Sriprom et al., 2010 <sup>E</sup> |
| 2007 | Khok Si Suphan            | 14                 |                                    |                             |         |                          | Sriprom et al., 2010 <sup>E</sup> |
| 2007 | Ku Su Man                 | 7                  |                                    |                             |         |                          | Sriprom et al., 2010 <sup>E</sup> |
| 2007 | Kut Bak                   | 0                  |                                    |                             |         |                          | Sriprom et al., 2010 <sup>E</sup> |
| 2007 | Mueang Sakon Nakhon       | 81                 |                                    |                             |         |                          | Sriprom et al., 2010 <sup>E</sup> |
| 2007 | Phang Khon                | 11                 |                                    |                             |         |                          | Sriprom et al., 2010 <sup>E</sup> |
| 2007 | Phanna Nikhom             | 9                  |                                    |                             |         |                          | Sriprom et al., 2010 <sup>E</sup> |
| 2007 | Phon Na Kaeo              | 11                 |                                    |                             |         |                          | Sriprom et al., 2010 <sup>E</sup> |
| 2007 | Phu Phan                  | 21                 |                                    |                             |         |                          | Sriprom et al., 2010 <sup>E</sup> |
| 2007 | Sawang Daen Din           | 54                 |                                    |                             |         |                          | Sriprom et al., 2010 <sup>E</sup> |
| 2007 | Song Dao                  | 22                 |                                    |                             |         |                          | Sriprom et al., 2010 <sup>E</sup> |
| 2007 | Tao Ngoi                  | 6                  |                                    |                             |         |                          | Sriprom et al., 2010 <sup>E</sup> |
| 2007 | Wanon Niwat               | 12                 |                                    |                             |         |                          | Sriprom et al., 2010 <sup>E</sup> |
| 2007 | Waritchaphum              | 17                 |                                    |                             |         |                          | Sriprom et al., 2010 <sup>E</sup> |
| 2007 | Sakon Nakhon province     | 265                |                                    |                             |         |                          | Sriprom et al., 2010 <sup>E</sup> |
| 2007 | Nakornpathom <sup>S</sup> |                    |                                    |                             | 108     | 0                        | Jianjaroonwong 2008 [45]          |
| 2007 | Central region            |                    | 129.34                             |                             |         |                          | MoPH, 2007 [30]                   |
| 2007 | Northern region           |                    | 73.25                              |                             |         |                          | MoPH, 2007 [30]                   |
| 2007 | Northeastern region       |                    | 83.05                              |                             |         |                          | MoPH, 2007 [30]                   |
| 2007 | Southern region           |                    | 137.96                             |                             |         |                          | MoPH, 2007 [30]                   |
| 2008 | Ang Thong                 |                    | 280.73                             |                             |         |                          | MoPH, 2008 [31]                   |
| 2008 | Chieng Mai                |                    | 255.55                             |                             |         |                          | MoPH, 2008 [31]                   |
| 2008 | Nakorn Pathom             |                    | 303.84                             |                             |         |                          | MoPH, 2008 [31]                   |
| 2008 | Nakorn Sawan              |                    | 245.63                             |                             |         |                          | MoPH, 2008 [31]                   |
| 2008 | Phuket                    |                    | 244.05                             |                             |         |                          | MoPH, 2008 [31]                   |
| 2008 | Rachaburi                 |                    | 383.25                             |                             |         |                          | MoPH, 2008 [31]                   |

| Year                    | Region                  | DF                 |                                    | Laboratory-confirmed DF (n) | DHF (n) | DF-related mortality (n) | Source of data                     |
|-------------------------|-------------------------|--------------------|------------------------------------|-----------------------------|---------|--------------------------|------------------------------------|
|                         |                         | Notified cases (n) | Incidence (per 100,000 population) |                             |         |                          |                                    |
| 2008                    | Rayong                  |                    | 355.29                             |                             |         |                          | MoPH, 2008 [31]                    |
| 2008                    | Samut Prakarn           |                    | 278.17                             |                             |         |                          | MoPH, 2008 [31]                    |
| 2008                    | Samut Sakorn            |                    | 321.07                             |                             |         |                          | MoPH, 2008 [31]                    |
| 2008                    | Utaradit                |                    | 271.55                             |                             |         |                          | MoPH, 2008 [31]                    |
| 2008–2009 <sup>ss</sup> | Lower Southern Thailand |                    | 1447                               |                             | 1827    |                          | Ditsuwan et al., 2011 <sup>F</sup> |
| 2009                    | Krabi                   |                    | 206.8                              |                             |         |                          | MoPH, 2009 [32]                    |
| 2009                    | Mae Hong Son            |                    | 244.27                             |                             |         |                          | MoPH, 2009 [32]                    |
| 2009                    | Pang Nga                |                    | 268.35                             |                             |         |                          | MoPH, 2009 [32]                    |
| 2009                    | Pataloong               |                    | 143.55                             |                             |         |                          | MoPH, 2009 [32]                    |
| 2009                    | Prae                    |                    | 146.29                             |                             |         |                          | MoPH, 2009 [32]                    |
| 2009                    | Rachaburi               |                    | 189.46                             |                             |         |                          | MoPH, 2009 [32]                    |
| 2009                    | Rayong                  |                    | 157.59                             |                             |         |                          | MoPH, 2009 [32]                    |
| 2009                    | Samut Prakarn           |                    | 176.69                             |                             |         |                          | MoPH, 2009 [32]                    |
| 2009                    | Songkla                 |                    | 150.99                             |                             |         |                          | MoPH, 2009 [32]                    |
| 2009                    | Tak                     |                    | 179.96                             |                             |         |                          | MoPH, 2009 [32]                    |
| 2010                    | Chanthaburi             |                    | 433.2                              |                             |         |                          | MoPH, 2010 [33]                    |
| 2010                    | Chiang Mai              |                    | 400                                |                             |         |                          | MoPH, 2010 [33]                    |
| 2010                    | Krabi                   |                    | 390.57                             |                             |         |                          | MoPH, 2010 [33]                    |
| 2010                    | Nakhon Si               |                    | 397.43                             |                             |         |                          | MoPH, 2010 [33]                    |
| 2010                    | Narathiwat              |                    | 475.69                             |                             |         |                          | MoPH, 2010 [33]                    |
| 2010                    | Pattani                 |                    | 490.6                              |                             |         |                          | MoPH, 2010 [33]                    |
| 2010                    | Phatthalung             |                    | 408.53                             |                             |         |                          | MoPH, 2010 [33]                    |
| 2010                    | Satun                   |                    | 359.84                             |                             |         |                          | MoPH, 2010 [33]                    |
| 2010                    | Songkhla                |                    | 447.84                             |                             |         |                          | MoPH, 2010 [33]                    |
| 2010                    | Tak                     |                    | 399.29                             |                             |         |                          | MoPH, 2010 [33]                    |

Empty cells denote no data are available. DF, dengue fever; DHF, dengue haemorrhagic fever; MoPH, Thai Ministry of Public Health.

\*Monthly incidence rate.

†Estimated from graphs.

‡June 1999 to March 2002.

§Data from one hospital (Kamphaeng Phet Field Station).

¶Patients with serological data available.

\*\*Children aged 5–15 years only.

††Data from Introduction of paper.

‡‡Data for January to June.

§§August 2008 to June 2009.

## References

- A. Silawan T, Singhasivanon P, Kaewkungwal J, Nimmanitya S, Suwonkerd W (2008) Temporal patterns and forecast of dengue infection in Northeastern Thailand. *Southeast Asian J Trop Med Public Health* 39(1): 90–98.
- B. Ellis RD, Fukuda MM, McDaniel P, Welch K, Nisalak A, et al. (2006) Causes of fever in adults on the Thai–Myanmar border. *Am J Trop Med Hyg* 74(1): 108–113.
- C. Anderson KB, Chunsuttiwat S, Nisalak A, Mammen MP, Libraty DH, et al. (2007) Burden of symptomatic dengue infection in children at primary school in Thailand: a prospective study. *Lancet* 369(9571): 1452–1459.
- D. Promprou S, Jaroensutasinee M, Jaroensutasinee K (2006) Forecasting dengue haemorrhagic fever cases in southern Thailand using ARIMA models. *Dengue Bull* 30: 99–106.
- E. Sriprom M, Chalvet-Monfray K, Chaimane T, Vongsawat K, Bicout DJ (2010) Monthly district level risk of dengue occurrences in Sakon Nakhon Province, Thailand. *Sci Total Environ*; 408(22): 5521–5528.
- F. Ditsuwan T, Liabsuetrakul T, Chongsuvivatwong V, Thammapalo S, McNeil E (2011) Assessing the spreading patterns of dengue infection and chikungunya fever outbreaks in lower southern Thailand using a geographic information system. *Ann Epidemiol* 21(4): 253–261.
