# Supplementary material for: Epidemiological Trends of Dengue Disease in Thailand (2000–2011): A Systematic Literature Review
Source: PubMed Central journal article supplement (PMC4222696; doi:10.1371/journal.pntd.0003241), 2014-11-06
Supplement: pntd.0003241.s005.pdf [file pntd.0003241.s005.pdf]

**Table S4. Age-specific patterns of dengue disease in Thailand [18, 23–34].**

| Characteristic                     | Age group (years) |           |           |            |            |           |           |           |           |             | Total      |
|------------------------------------|-------------------|-----------|-----------|------------|------------|-----------|-----------|-----------|-----------|-------------|------------|
|                                    | 0–4               | 5–9       | 10–14     | 15–24      | 25–34      | 35–44     | 45–54     | 55–64     | 65+       | Unknown age |            |
| <b>2000</b>                        |                   |           |           |            |            |           |           |           |           |             |            |
| DSS (27), n                        |                   |           |           |            |            |           |           |           |           |             |            |
| DHF (26), n                        |                   |           |           |            |            |           |           |           |           |             |            |
| DF (66), n                         |                   |           |           |            |            |           |           |           |           |             |            |
| Total dengue disease (26,27,66), n | 2758              | 6181      | 5260      | 2744       | 964        | 472       | 137       | 57        | 44        | 0           | 18,617     |
| Deaths, n                          | 8                 | 11        | 9         | 2          | 2          | 0         | 0         | 0         | 0         | 0           | 32         |
| Population, n                      | 5,173,354         | 5,340,120 | 5,411,127 | 11,340,156 | 10,746,046 | 9,141,069 | 6,562,362 | 4,397,633 | 3,658,392 |             | 61,770,259 |
| Incidence, /100,000                | 53.31             | 115.75    | 97.21     | 24.20      | 8.97       | 5.16      | 2.09      | 1.30      | 1.20      |             | 30.14      |
| CFR                                | 0.29              | 0.18      | 0.17      | 0.07       | 0.21       | 0.00      | 0.00      | 0.00      | 0.00      |             | 0.17       |
| <b>2001</b>                        |                   |           |           |            |            |           |           |           |           |             |            |
| DSS (27), n                        |                   |           |           |            |            |           |           |           |           |             |            |
| DHF (26), n                        |                   |           |           |            |            |           |           |           |           |             |            |
| DF (66), n                         |                   |           |           |            |            |           |           |           |           |             |            |
| Total dengue disease (26,27,66), n | 16,952            | 43,813    | 40,213    | 24,897     | 7835       | 3500      | 1380      | 491       | 274       | 0           | 139,355    |
| Deaths, n                          | 34                | 91        | 53        | 39         | 16         | 5         | 4         | 2         | 1         | 0           | 245        |
| Population, n                      | 5,125,593         | 5,293,426 | 5,371,420 | 11,247,513 | 10,810,122 | 9,251,874 | 6,806,804 | 4,429,535 | 3,757,568 |             | 62,093,855 |
| Incidence, /100,000                | 330.73            | 827.69    | 748.65    | 221.36     | 72.48      | 37.83     | 20.27     | 11.08     | 7.29      |             | 224.43     |
| CFR                                | 0.20              | 0.21      | 0.13      | 0.16       | 0.20       | 0.14      | 0.29      | 0.41      | 0.36      |             | 0.18       |
| <b>2002</b>                        |                   |           |           |            |            |           |           |           |           |             |            |
| DSS (27), n                        | 268               | 1195      | 1053      | 260        | 61         | 42        | 15        | 12        | 12        | 0           | 2918       |
| DHF (26), n                        | 7092              | 21,666    | 24,097    | 16,820     | 5322       | 2416      | 1028      | 419       | 255       | 38          | 79,153     |
| DF (66), n                         | 4032              | 10,473    | 10,104    | 5011       | 1682       | 837       | 360       | 128       | 99        | 3           | 32,729     |

| Characteristic                     | Age group (years) |           |           |            |            |            |           |           |           |             | Total      |
|------------------------------------|-------------------|-----------|-----------|------------|------------|------------|-----------|-----------|-----------|-------------|------------|
|                                    | 0-4               | 5-9       | 10-14     | 15-24      | 25-34      | 35-44      | 45-54     | 55-64     | 65+       | Unknown age |            |
| Total dengue disease (26,27,66), n | 11,392            | 33,334    | 35,254    | 22,091     | 7065       | 3295       | 1403      | 559       | 366       | 41          | 114,800    |
| Deaths, n                          | 27                | 68        | 37        | 29         | 6          | 7          | 2         | 0         | 0         | 0           | 176        |
| Population, n                      | 4,291,010         | 5,012,944 | 4,846,628 | 10,578,583 | 11,603,961 | 10,462,603 | 7,099,944 | 4,278,967 | 4,379,761 |             | 62,554,401 |
| Incidence, /100,000                | 265.49            | 664.96    | 727.39    | 208.83     | 60.88      | 31.49      | 19.76     | 13.06     | 8.36      |             | 183.52     |
| CFR                                | 0.24              | 0.20      | 0.10      | 0.13       | 0.08       | 0.21       | 0.14      | 0.00      | 0.00      |             | 0.15       |
| <b>2003</b>                        |                   |           |           |            |            |            |           |           |           |             |            |
| DSS (27), n                        | 108               | 493       | 447       | 128        | 42         | 14         | 13        | 17        | 24        | 2           | 1288       |
| DHF (26), n                        | 3229              | 10,765    | 13,443    | 10,493     | 3800       | 1838       | 793       | 306       | 150       | 60          | 44,877     |
| DF (66), n                         | 1865              | 5198      | 5561      | 2977       | 968        | 511        | 233       | 109       | 65        | 5           | 17,492     |
| Total dengue disease (26,27,66), n | 5202              | 16,456    | 19,451    | 13,598     | 4810       | 2363       | 1039      | 432       | 239       | 67          | 63,657     |
| Deaths, n                          | 10                | 21        | 14        | 3          | 4          | 0          | 0         | 0         | 0         | 0           | 52         |
| Population, n                      | 4,133,411         | 4,982,438 | 4,922,276 | 10,371,683 | 11,501,542 | 10,700,519 | 7,415,280 | 4,384,319 | 4,528,351 |             | 62,939,819 |
| Incidence, /100,000                | 125.85            | 330.28    | 395.16    | 131.11     | 41.82      | 22.08      | 14.01     | 9.85      | 5.28      |             | 101.14     |
| CFR                                | 0.19              | 0.13      | 0.07      | 0.02       | 0.08       | 0.00       | 0.00      | 0.00      | 0.00      |             | 0.08       |
| <b>2004</b>                        |                   |           |           |            |            |            |           |           |           |             |            |
| DSS (27), n                        | 68                | 294       | 322       | 101        | 24         | 15         | 6         | 9         | 3         | 1           | 843        |
| DHF (26), n                        | 1737              | 5808      | 7916      | 6836       | 2605       | 1316       | 544       | 171       | 140       | 38          | 27,111     |
| DF (66), n                         | 1028              | 3134      | 3650      | 2032       | 719        | 348        | 173       | 64        | 30        | 3           | 11,181     |
| Total dengue disease (26,27,66), n | 2833              | 9236      | 11,888    | 8969       | 3348       | 1679       | 723       | 244       | 173       | 42          | 39,135     |
| Deaths, n                          | 7                 | 10        | 6         | 6          | 2          | 3          | 0         | 1         | 0         | 0           | 35         |
| Population, n                      | 4,133,411         | 4,982,438 | 4,922,276 | 10,371,683 | 11,501,542 | 10,762,684 | 7,640,375 | 4,433,108 | 4,573,101 |             | 63,320,618 |
| Incidence, /100,000                | 68.54             | 185.37    | 241.51    | 86.48      | 29.11      | 15.60      | 9.46      | 5.50      | 3.78      |             | 61.80      |
| CFR                                | 0.25              | 0.11      | 0.05      | 0.07       | 0.06       | 0.18       | 0.00      | 0.41      | 0.00      |             | 0.09       |

| Characteristic                     | Age group (years) |           |           |            |            |            |           |           |           |             | Total      |
|------------------------------------|-------------------|-----------|-----------|------------|------------|------------|-----------|-----------|-----------|-------------|------------|
|                                    | 0-4               | 5-9       | 10-14     | 15-24      | 25-34      | 35-44      | 45-54     | 55-64     | 65+       | Unknown age |            |
| <b>2005</b>                        |                   |           |           |            |            |            |           |           |           |             |            |
| DSS (27), n                        | 75                | 293       | 323       | 115        | 51         | 23         | 15        | 11        | 16        | 0           | 922        |
| DHF (26), n                        | 1804              | 5656      | 8157      | 8184       | 3312       | 1588       | 708       | 255       | 179       | 58          | 29,901     |
| DF (66), n                         | 1241              | 3890      | 4637      | 3090       | 1154       | 607        | 279       | 104       | 60        | 8           | 15,070     |
| Total dengue disease (26,27,66), n | 3120              | 9839      | 13,117    | 11,389     | 4517       | 2218       | 1002      | 370       | 255       | 66          | 45,893     |
| Deaths, n                          | 5                 | 15        | 8         | 7          | 9          | 3          | 1         | 1         | 1         | 0           | 50         |
| Population, n                      | 4,033,986         | 4,833,182 | 4,905,179 | 10,094,340 | 11,250,738 | 10,753,119 | 7,861,649 | 4,553,211 | 4,608,850 |             | 62,894,254 |
| Incidence, /100,000                | 77.34             | 203.57    | 267.41    | 112.83     | 40.15      | 20.63      | 12.75     | 8.13      | 5.53      |             | 72.97      |
| CFR                                | 0.16              | 0.15      | 0.06      | 0.06       | 0.20       | 0.14       | 0.10      | 0.27      | 0.39      |             | 0.11       |
| <b>2006</b>                        |                   |           |           |            |            |            |           |           |           |             |            |
| DSS (27), n                        | 39                | 247       | 287       | 113        | 31         | 15         | 2         | 4         | 5         | 0           | 743        |
| DHF (26), n                        | 1482              | 5267      | 8291      | 8039       | 3103       | 1685       | 670       | 265       | 171       | 51          | 29,024     |
| DF (66), n                         | 1262              | 4345      | 5731      | 3476       | 1125       | 601        | 314       | 122       | 73        | 13          | 17,062     |
| Total dengue disease (26,27,66), n | 2783              | 9859      | 14,309    | 11,628     | 4259       | 2301       | 986       | 391       | 249       | 64          | 46,829     |
| Deaths, n                          | 3                 | 15        | 8         | 11         | 5          | 2          | 0         | 0         | 0         | 0           | 44         |
| Population, n                      | 3,991,348         | 4,649,267 | 4,871,031 | 9,855,993  | 11,051,410 | 10,878,282 | 8,154,852 | 4,755,480 | 4,737,730 |             | 62,945,393 |
| Incidence, /100,000                | 69.73             | 212.05    | 293.76    | 117.98     | 38.54      | 21.15      | 12.09     | 8.22      | 5.26      |             | 74.40      |
| CFR                                | 0.11              | 0.15      | 0.06      | 0.09       | 0.12       | 0.09       | 0.00      | 0.00      | 0.00      |             | 0.09       |
| <b>2007</b>                        |                   |           |           |            |            |            |           |           |           |             |            |
| DSS (27), n                        | 93                | 297       | 382       | 183        | 56         | 45         | 13        | 6         | 7         | 0           | 1082       |
| DHF (26), n                        | 2268              | 7105      | 11,099    | 11,005     | 4060       | 2105       | 854       | 359       | 169       | 29          | 39,053     |
| DF (66), n                         | 2009              | 6198      | 8197      | 5539       | 1805       | 940        | 454       | 172       | 124       | 8           | 25,446     |
| Total dengue disease (26,27,66), n | 4370              | 13,600    | 19,678    | 16,727     | 5921       | 3090       | 1321      | 537       | 300       | 37          | 65,581     |

| Characteristic                     | Age group (years) |           |           |           |            |            |           |           |           |             | Total      |
|------------------------------------|-------------------|-----------|-----------|-----------|------------|------------|-----------|-----------|-----------|-------------|------------|
|                                    | 0-4               | 5-9       | 10-14     | 15-24     | 25-34      | 35-44      | 45-54     | 55-64     | 65+       | Unknown age |            |
| Deaths, n                          | 13                | 10        | 10        | 17        | 5          | 3          | 0         | 1         | 0         | 0           | 59         |
| Population, n                      | 3,991,894         | 4,309,597 | 4,928,686 | 9,711,468 | 10,864,536 | 10,976,511 | 8,427,774 | 4,923,180 | 4,799,869 |             | 62,933,515 |
| Incidence, /100,000                | 109.47            | 315.57    | 399.25    | 172.24    | 54.50      | 28.15      | 15.67     | 10.91     | 6.25      |             | 104.21     |
| CFR                                | 0.30              | 0.07      | 0.05      | 0.10      | 0.08       | 0.10       | 0.00      | 0.19      | 0.00      |             | 0.09       |
| <b>2008</b>                        |                   |           |           |           |            |            |           |           |           |             |            |
| DSS (27), n                        | 175               | 450       | 527       | 286       | 93         | 44         | 22        | 18        | 11        | 0           | 1626       |
| DHF (26), n                        | 3326              | 8069      | 12,907    | 15,140    | 6084       | 3727       | 1252      | 528       | 309       | 13          | 51,355     |
| DF (66), n                         | 2903              | 7804      | 11,046    | 8540      | 3249       | 1623       | 897       | 355       | 217       | 11          | 36,645     |
| Total dengue disease (26,27,66), n | 6404              | 16,323    | 24,480    | 23,966    | 9426       | 5394       | 2171      | 901       | 537       | 24          | 89,626     |
| Deaths, n                          | 12                | 16        | 21        | 9         | 7          | 2          | 0         | 3         | 0         | 0           | 70         |
| Population, n                      | 3,997,249         | 4,176,511 | 4,909,870 | 9,676,828 | 10,785,330 | 11,011,976 | 8,683,063 | 5,127,064 | 4,846,131 |             | 63,214,022 |
| Incidence, /100,000                | 160.21            | 390.83    | 498.59    | 247.66    | 87.40      | 48.98      | 25.00     | 17.57     | 11.08     |             | 141.78     |
| CFR                                | 0.19              | 0.10      | 0.09      | 0.04      | 0.07       | 0.04       | 0.00      | 0.33      | 0.00      |             | 0.08       |
| <b>2009</b>                        |                   |           |           |           |            |            |           |           |           |             |            |
| DSS (27), n                        | 72                | 198       | 345       | 227       | 60         | 41         | 16        | 9         | 9         | 0           | 977        |
| DHF (26), n                        | 1784              | 4342      | 7545      | 8873      | 3937       | 2107       | 1099      | 484       | 292       | 17          | 30,480     |
| DF (66), n                         | 1808              | 4677      | 7207      | 6159      | 2566       | 1407       | 786       | 344       | 232       | 8           | 25,194     |
| Total dengue disease (26,27,66), n | 3664              | 9217      | 15,097    | 15,259    | 6563       | 3555       | 1901      | 837       | 533       | 25          | 56,651     |
| Deaths, n                          | 2                 | 9         | 10        | 12        | 3          | 1          | 1         | 1         | 0         | 0           | 39         |
| Population, n*                     | 3,887,114         | 4,017,963 | 4,675,453 | 9,375,403 | 10,339,883 | 10,706,067 | 8,886,822 | 5,367,810 | 4,938,049 | 1,330,498   | 63,525,062 |
| Incidence, /100,000                | 94.26             | 229.39    | 322.90    | 162.76    | 63.47      | 33.21      | 21.39     | 15.59     | 10.79     |             | 89.18      |
| CFR                                | 0.05              | 0.10      | 0.07      | 0.08      | 0.05       | 0.03       | 0.05      | 0.12      | 0.00      |             | 0.07       |

| Characteristic                     | Age group (years) |           |           |            |            |            |           |            |           |             | Total      |
|------------------------------------|-------------------|-----------|-----------|------------|------------|------------|-----------|------------|-----------|-------------|------------|
|                                    | 0-4               | 5-9       | 10-14     | 15-24      | 25-34      | 35-44      | 45-54     | 55-64      | 65+       | Unknown age |            |
| <b>2010</b>                        |                   |           |           |            |            |            |           |            |           |             |            |
| DSS (27), n                        | 236               | 745       | 907       | 648        | 238        | 116        | 81        | 37         | 20        | 0           | 3028       |
| DHF (26), n                        | 3665              | 8982      | 14,013    | 17,768     | 8239       | 4150       | 2350      | 1063       | 515       | 25          | 60,770     |
| DF (66), n                         | 3834              | 9644      | 13,598    | 13,667     | 6006       | 3171       | 1937      | 819        | 4595      | 14          | 53,149     |
| Total dengue disease (26,27,66), n | 7735              | 19,371    | 28,518    | 32,083     | 14,483     | 7437       | 4368      | 1919       | 994       | 39          | 116,947    |
| Deaths, n                          | 13                | 36        | 20        | 21         | 4          | 3          | 3         | 1          | 2         | 0           | 103        |
| Population, n*                     | 3,765,907         | 4,144,169 | 4,936,475 | 9,779,788  | 10,250,984 | 11,122,872 | 9,795,713 | 6,346,144  | 5,784,208 |             | 65,926,260 |
| Incidence, /100,000                | 205.40            | 467.43    | 577.70    | 328.05     | 141.28     | 66.86      | 44.59     | 30.24      | 17.18     |             | 177.39     |
| CFR                                | 0.17              | 0.19      | 0.07      | 0.07       | 0.03       | 0.04       | 0.07      | 0.05       | 0.20      |             | 0.09       |
| <b>2011</b>                        |                   |           |           |            |            |            |           |            |           |             |            |
| DSS (27), n                        | 98                | 347       | 410       | 281        | 129        | 62         | 39        | 26         | 10        | 0           | 1402       |
| DHF (26), n                        | 2071              | 5170      | 8720      | 11,293     | 5509       | 3017       | 1628      | 782        | 447       | 2           | 38,639     |
| DF (66), n                         | 2225              | 5586      | 7429      | 7397       | 3309       | 1806       | 1088      | 569        | 350       | 0           | 29,759     |
| Total dengue disease (26,27,66), n | 4394              | 11,103    | 16,559    | 18,971     | 8947       | 4885       | 2755      | 1377       | 807       | 2           | 69,800     |
| Deaths, n                          | 7                 | 13        | 9         | 5          | 8          | 3          | 2         | 0          | 0         | 0           | 47         |
| Population, n**†                   | 5,056,465         | 4,767,609 | 3,838,856 | 10,415,660 | 10,641,580 | 11,031,978 | 9,927,651 | 11,896,846 |           |             | 67,576,645 |
| Incidence, /100,000                | 86.90             | 232.88    | 431.35    | 182.14     | 84.08      | 44.28      | 27.75     | 18.36      |           |             | 103.29     |
| CFR                                | 0.16              | 0.12      | 0.05      | 0.03       | 0.09       | 0.06       | 0.07      | 0.00       | 0.00      |             | 0.07       |

Empty cells: data not provided. CFR, case fatality rate; DF, dengue fever; DHF, dengue haemorrhagic fever; DSS, dengue shock syndrome.

\*Data from the 2010 population and housing census, National Statistical Office [18]. \*\* Estimate

†Age bands for 2011 differ from other years (0-5, 6-10, 11-14, 15-24, 25-34, 35-44, 45-54, 55+) and do not match bands for disease numbers: consequently, some 2011 incidence figures are estimations.
