# Supplementary material for: Epidemiological Trends of Dengue Disease in Thailand (2000–2011): A Systematic Literature Review
Source: PubMed Central journal article supplement (PMC4222696; doi:10.1371/journal.pntd.0003241), 2014-11-06
Supplement: pntd.0003241.s006.pdf [file pntd.0003241.s006.pdf]

Table S5. Serotype distribution of dengue viruses

**Table S5. Serotype distribution of dengue viruses in Thailand: national and/or regional studies.**

| Year              | Region                     | DENV-1 (%) | DENV-2 (%) | DENV-3 (%)     | DENV-4 (%) | Cases tested (n) | Source of data                  |
|-------------------|----------------------------|------------|------------|----------------|------------|------------------|---------------------------------|
| 1998–2000         | Kamphaeng Phet             | 23         | 35         | 41             | 1          | 108              | Endy et al., 2002 [48]          |
| 2000              | Lampang*                   | 86         | 7          | 0/15           | 7          | 15               | Anantapreecha et al., 2004 [50] |
| 2000              | Maharat Nakhon Ratchasima* | 67         | 33         | 0              | 0          | 3                | Anantapreecha et al., 2004 [50] |
| 2000              | Pathum Thani*              | 25         | 50         | 25             | 0          | 4                | Anantapreecha et al., 2004 [50] |
| 2000              | Chareonkrug Pracharak*     | 50         | 40         | 10             | 0          | 10               | Anantapreecha et al., 2004 [50] |
| 2000              | Ratchaburi*                | 42         | 4          | 52             | 2          | 238              | Anantapreecha et al., 2004 [50] |
| 2000              | Hadyai*                    | 95         | 0          | 5              | 0          | 22               | Anantapreecha et al., 2004 [50] |
| 2000 <sup>†</sup> | Bangkok <sup>†</sup>       | 42         | 42         | 16             | 0          | 31               | Sriprom et al., 2003 [38]       |
| 2000              | Bangkok                    | 47         | 27         | 17             | 10         | 31               | Fried et al., 2010 [52]         |
| 2000–2001         | Bangkok                    | 100        | 0          | 0              | 0          | 64               | Khawsak et al., 2003 [49]       |
| 2000–2001         | Samut Prakan               | 0          | 50         | 0              | 50         | 2                | Khawsak et al., 2003 [49]       |
| 2000–2001         | Nakhon Sawan               | 12         | 12         | 41             | 35         | 17               | Khawsak et al., 2003 [49]       |
| 2000–2001         | Pathum Thani               | 0          | 70         | 0              | 30         | 10               | Khawsak et al., 2003 [49]       |
| 2000–2001         | Ratchaburi                 | 0          | 19         | 31             | 50         | 23 <sup>‡</sup>  | Khawsak et al., 2003 [49]       |
| 2000–2001         | Nakhon Pathom              | 25         | 25         | 33             | 17         | 33 <sup>‡</sup>  | Khawsak et al., 2003 [49]       |
| 2000–2001         | Samut Songkhram            | 0          | 0          | 25             | 75         | 8                | Khawsak et al., 2003 [49]       |
| 2000–2001         | Ubon Ratchathani           | 0          | 44         | 11             | 44         | 10 <sup>‡</sup>  | Khawsak et al., 2003 [49]       |
| 2000–2001         | Udon Thani                 | 0          | 0          | 0 <sup>§</sup> | 100        | 7 <sup>‡</sup>   | Khawsak et al., 2003 [49]       |
| 2000–2001         | Chian Rai                  | 0          | 38         | 0              | 62         | 15 <sup>‡</sup>  | Khawsak et al., 2003 [49]       |
| 2000–2001         | Phitsanulok                | 0          | 90         | 10             | 0          | 10               | Khawsak et al., 2003 [49]       |
| 2000–2001         | Ranong                     | 0          | 83         | 0              | 17         | 6 <sup>‡</sup>   | Khawsak et al., 2003 [49]       |

Table S5. Serotype distribution of dengue viruses

| Year      | Region                     | DENV-1 (%) | DENV-2 (%) | DENV-3 (%) | DENV-4 (%) | Cases tested (n) | Source of data                  |
|-----------|----------------------------|------------|------------|------------|------------|------------------|---------------------------------|
| 2000–2001 | Nakhon Si Thammarat        | 10         | 32         | 37         | 21         | 19 <sup>‡</sup>  | Khawsak et al., 2003 [49]       |
| 2000–2001 | Yala                       | 0          | 0          | 33         | 67         | 9 <sup>‡</sup>   | Khawsak et al., 2003 [49]       |
| 2001      | Lampang*                   | 57         | 23         | 19         | 1          | 150              | Anantapreecha et al., 2004 [50] |
| 2001      | Maharat Nakhon Ratchasima* | 47         | 39         | 9          | 5          | 176              | Anantapreecha et al., 2004 [50] |
| 2001      | Pathum Thani*              | 41         | 41         | 13         | 5          | 143              | Anantapreecha et al., 2004 [50] |
| 2001      | Chareonkrug Pracharak*     | 61         | 25         | 11         | 3          | 99               | Anantapreecha et al., 2004 [50] |
| 2001      | Ratchaburi*                | 38         | 17         | 37         | 7          | 256              | Anantapreecha et al., 2004 [50] |
| 2001      | Hadyai*                    | 79         | 2          | 14         | 5          | 276              | Anantapreecha et al., 2004 [50] |
| 2001      | Bangkok <sup>†</sup>       | 44         | 33         | 16         | 7          | 110              | Sriprom et al., 2003 [38]       |
| 2001      | Bangkok                    | 42         | 42         | 13         | 2          | 45               | Fried et al., 2010 [52]         |
| 2002      | Lampang*                   | 11         | 79         | 8          | 2          | 95               | Anantapreecha et al., 2004 [50] |
| 2002      | Maharat Nakhon Ratchasima* | 57         | 24         | 17         | 2          | 292              | Anantapreecha et al., 2004 [50] |
| 2002      | Pathum Thani*              | 47         | 25         | 22         | 6          | 32               | Anantapreecha et al., 2004 [50] |
| 2002      | Chareonkrug Pracharak*     | 65         | 25         | 5          | 5          | 65               | Anantapreecha et al., 2004 [50] |
| 2002      | Ratchaburi*                | 12         | 64         | 7          | 7          | 170              | Anantapreecha et al., 2004 [50] |
| 2002      | Hadyai*                    | 44         | 17         | 17         | 22         | 77               | Anantapreecha et al., 2004 [50] |
| 2002      | Chiangmai                  | 48.7       | 35.9       | 0          | 15.4       | 39               | Veeraseatakul et al., 2007 [51] |
| 2002      | Lamphun                    | 33.3       | 66.7       | 0          | 0          | 6                | Veeraseatakul et al., 2007 [51] |
| 2002      | Lampang                    | 0          | 100        | 0          | 0          | 5                | Veeraseatakul et al., 2007 [51] |
| 2002      | Mae Hong Son               | 0          | 0          | 0          | 0          | 0                | Veeraseatakul et al., 2007 [51] |
| 2002      | Phrae                      | 0          | 0          | 0          | 0          | 0                | Veeraseatakul et al., 2007 [51] |
| 2002      | Northern region (total)    | 42.0       | 46.0       | 0          | 12.0       | 50               | Veeraseatakul et al., 2007 [51] |

Table S5. Serotype distribution of dengue viruses

| Year               | Region                  | DENV-1 (%) | DENV-2 (%) | DENV-3 (%) | DENV-4 (%) | Cases tested (n) | Source of data                  |
|--------------------|-------------------------|------------|------------|------------|------------|------------------|---------------------------------|
| 2002 <sup>†</sup>  | Bangkok                 | 46         | 44         | 8          | 2          | 50               | Sriprom et al., 2003 [38]       |
| 2002               | Bangkok                 | 50         | 45         | 5          | 0          | 24               | Fried et al., 2010 [52]         |
| 2002–2006          | Northern region (total) | 30.6       | 47.2       | 3.8        | 18.4       | 559              | Veeraseatakul et al., 2007 [51] |
| 2003               | Chiangmai               | 33.3       | 54.8       | 4.7        | 7.2        | 42               | Veeraseatakul et al., 2007 [51] |
| 2003               | Lamphun                 | 0          | 100        | 0          | 0          | 2                | Veeraseatakul et al., 2007 [51] |
| 2003               | Lampang                 | 37.5       | 62.5       | 0          | 0          | 16               | Veeraseatakul et al., 2007 [51] |
| 2003               | Mae Hong Son            | 0          | 100        | 0          | 0          | 2                | Veeraseatakul et al., 2007 [51] |
| 2003               | Phrae                   | 0          | 0          | 0          | 0          | 0                | Veeraseatakul et al., 2007 [51] |
| 2003               | Northern region (total) | 32.3       | 59.7       | 3.2        | 4.8        | 62               | Veeraseatakul et al., 2007 [51] |
| 2003 <sup>†¶</sup> | Bangkok                 | 42         | 23         | 34         | 1          | 29               | Sriprom et al., 2003 [38]       |
| 2003               | Central region          | 57.6       | 16.7       | 19.8       | 5.9        |                  | MoPH, 2003 [26]                 |
| 2003               | Northern region         | 73         | 8.3        | 12.9       | 5.9        |                  | MoPH, 2003 [26]                 |
| 2003               | Northeastern region     | 47.4       | 21.0       | 10.7       | 20.8       |                  | MoPH, 2003 [26]                 |
| 2003               | Southern region         | 57.5       | 16.4       | 15.9       | 10.2       |                  | MoPH, 2003 [26]                 |
| 2004               | Chiangmai               | 24.5       | 71.4       | 1.0        | 3.1        | 98               | Veeraseatakul et al., 2007 [51] |
| 2004               | Lamphun                 | 40.0       | 50.0       | 0          | 10.0       | 20               | Veeraseatakul et al., 2007 [51] |
| 2004               | Lampang                 | 17.2       | 79.3       | 3.5        | 0          | 29               | Veeraseatakul et al., 2007 [51] |
| 2004               | Mae Hong Son            | 0          | 100        | 0          | 0          | 1                | Veeraseatakul et al., 2007 [51] |
| 2004               | Phrae                   | 0          | 0          | 0          | 0          | 0                | Veeraseatakul et al., 2007 [51] |
| 2004               | Northern region (total) | 25.0       | 70.3       | 1.4        | 3.3        | 148              | Veeraseatakul et al., 2007 [51] |
| 2004               | Bangkok                 | 40         | 10         | 2          | 48         | 50               | Fried et al., 2010 [52]         |
| 2004               | Central region          | 57.6       | 16.7       | 19.8       | 5.9        |                  | MoPH, 2004 [27]                 |
| 2004               | Northern region         | 73         | 8.3        | 12.9       | 5.9        |                  | MoPH, 2004 [27]                 |
| 2004               | Northeastern region     | 47.4       | 21.0       | 10.7       | 20.8       |                  | MoPH, 2004 [27]                 |
| 2004               | Southern region         | 57.5       | 16.4       | 15.9       | 10.2       |                  | MoPH, 2004 [27]                 |
| 2004               | Total                   | 28.1       | 33.4       | 2.5        | 36.0       |                  | MoPH, 2004 [27]                 |
| 2005               | Chiangmai               | 24.0       | 52.0       | 5.3        | 18.7       | 75               | Veeraseatakul et al., 2007 [51] |

Table S5. Serotype distribution of dengue viruses

| Year | Region                  | DENV-1 (%) | DENV-2 (%) | DENV-3 (%) | DENV-4 (%) | Cases tested (n) | Source of data                  |
|------|-------------------------|------------|------------|------------|------------|------------------|---------------------------------|
| 2005 | Lamphun                 | 8.8        | 17.6       | 11.8       | 61.8       | 34               | Veeraseatakul et al., 2007 [51] |
| 2005 | Lampang                 | 26.6       | 40.0       | 26.6       | 6.8        | 15               | Veeraseatakul et al., 2007 [51] |
| 2005 | Mae Hong Son            | 8.3        | 75.1       | 8.3        | 8.3        | 12               | Veeraseatakul et al., 2007 [51] |
| 2005 | Phrae                   | 27.8       | 50.0       | 0          | 22.2       | 18               | Veeraseatakul et al., 2007 [51] |
| 2005 | Northern region (total) | 20.2       | 44.8       | 8.4        | 26.6       | 154              | Veeraseatakul et al., 2007 [51] |
| 2005 | Bangkok                 | 25         | 16         | 19         | 41         | 32               | Fried et al., 2010 [52]         |
| 2005 | Central region          | 39.6       | 9.8        | 4.5        | 46.1       |                  | MoPH, 2005 [28]                 |
| 2005 | Northern region         | 31.7       | 29.0       | 8.9        | 30.4       |                  | MoPH, 2005 [28]                 |
| 2005 | Northeastern region     | 39.2       | 13.5       | 4.0        | 43.3       |                  | MoPH, 2005 [28]                 |
| 2005 | Southern region         | 39.3       | 24.5       | 4.9        | 31.3       |                  | MoPH, 2005 [28]                 |
| 2005 | Total                   | 37.5       | 18.4       | 5.7        | 38.4       |                  | MoPH, 2005 [28]                 |
| 2006 | Chiangmai               | 56.9       | 3.9        | 3.9        | 35.3       | 51               | Veeraseatakul et al., 2007 [51] |
| 2006 | Lamphun                 | 11.1       | 0          | 11.1       | 77.8       | 9                | Veeraseatakul et al., 2007 [51] |
| 2006 | Lampang                 | 71.4       | 0          | 14.3       | 14.3       | 7                | Veeraseatakul et al., 2007 [51] |
| 2006 | Mae Hong Son            | 80.0       | 20.0       | 0          | 0          | 5                | Veeraseatakul et al., 2007 [51] |
| 2006 | Phrae                   | 31.5       | 38.4       | 0          | 30.1       | 73               | Veeraseatakul et al., 2007 [51] |
| 2006 | Northern region (total) | 42.8       | 21.3       | 2.8        | 33.1       | 145              | Veeraseatakul et al., 2007 [51] |
| 2006 | Bangkok                 | 40         | 2          | 35         | 23         | 44               | Fried et al., 2010 [52]         |
| 2006 | Central region          | 54.6       | 7.2        | 6.5        | 31.7       |                  | MoPH, 2006 [29]                 |
| 2006 | Northern region         | 54.2       | 7.1        | 6.3        | 32.4       |                  | MoPH, 2006 [29]                 |
| 2006 | Northeastern region     | 40.6       | 32.7       | 6.0        | 20.7       |                  | MoPH, 2006 [29]                 |
| 2006 | Southern region         | 42.9       | 30.4       | 7.1        | 19.6       |                  | MoPH, 2006 [29]                 |
| 2006 | Total                   | 43.4       | 39.8       | 4.1        | 12.7       | 1766             | MoPH, 2006 [29]                 |
| 2007 | Central region          | 54.8       | 11.9       | 22.9       | 10.4       |                  | MoPH, 2007 [30]                 |
| 2007 | Northern region         | 64.8       | 11.3       | 5.2        | 18.7       |                  | MoPH, 2007 [30]                 |
| 2007 | Northeastern region     | 69.6       | 13.2       | 9.7        | 7.5        |                  | MoPH, 2007 [30]                 |
| 2007 | Southern region         | 56.1       | 17.7       | 12.8       | 13.4       |                  | MoPH, 2007 [30]                 |
| 2007 | Total                   | 60.9       | 12.5       | 14.9       | 11.7       | 2302             | MoPH, 2007 [30]                 |
| 2008 | Central region          | 57.6       | 16.7       | 19.8       | 5.9        |                  | MoPH, 2008 [31]                 |
| 2008 | Northern region         | 73.0       | 8.3        | 12.9       | 5.9        |                  | MoPH, 2008 [31]                 |

Table S5. Serotype distribution of dengue viruses

| Year | Region              | DENV-1 (%) | DENV-2 (%) | DENV-3 (%) | DENV-4 (%) | Cases tested (n) | Source of data  |
|------|---------------------|------------|------------|------------|------------|------------------|-----------------|
| 2008 | Northeastern region | 47.4       | 21.0       | 10.7       | 20.8       |                  | MoPH, 2008 [31] |
| 2008 | Southern region     | 57.5       | 16.4       | 15.9       | 10.2       |                  | MoPH, 2008 [31] |
| 2008 | Total               | 57.5       | 16.4       | 15.9       | 10.2       | 2987             | MoPH, 2008 [31] |
| 2009 | Central region      | 39.5       | 23.5       | 32.4       | 4.6        |                  | MoPH, 2009 [32] |
| 2009 | Northern region     | 69.6       | 25.3       | 5.1        | 0          |                  | MoPH, 2009 [32] |
| 2009 | Northeastern region | 60.0       | 40.0       | 0          | 0          |                  | MoPH, 2009 [32] |
| 2009 | Southern region     | 65.8       | 13.2       | 19.7       | 1.3        |                  | MoPH, 2009 [32] |
| 2009 | Total               | 47.6       | 28.8       | 20.2       | 3.4        | 555              | MoPH, 2009 [32] |
| 2010 | Central region      | 25.8       | 45.0       | 15.1       | 6.2        | 225              | MoPH, 2010 [33] |
| 2010 | Northern region     | 26.5       | 70.6       | 2.9        | 0          | 34               | MoPH, 2010 [33] |
| 2010 | Northeastern region | 41.7       | 41.7       | 16.7       | 0          | 12               | MoPH, 2010 [33] |
| 2010 | Southern region     | 20.0       | 54.5       | 23.6       | 0          | 55               | MoPH, 2010 [33] |

DENV, dengue virus; DHF, dengue haemorrhagic fever; MoPH, Thai Ministry of Public Health.

\*Data from one hospital in the province.

†DHF cases only.

‡Includes patients with mixed serotypes not included in stated percentages.

§Six patients had mixed DENV-3 and DENV-4 serotype.

¶Data for January–June.
